# Supplementary material for: Components of Savings Accumulation in Nigeria: An Empirical Evidence
Source: Preprints.org preprint supplement (doi:10.20944/preprints201810.0051.v1), 2018-10-03
Supplement: Supplementary file 3 [file supplementary]

## Sheet: Sheet1
YEAR	PCGDP	FDI	INF	EXCHR	INTR	FinDep	GNS	M2	GDP
1980	248688	7.3887e+08	12.4197	0.546358	8.43167	2.19696e-06	1.50443e+10	14389900000	6.42018e+10					PCGDP=Per Capita GDP
1981	239747	5.42327e+08	18.459	0.610025	8.91667	2.54445e-06	6.69214e+09	15238900000	6.10765e+10					FDI=Foreign Direct Investment
1982	221940	4.30611e+08	4.82934	0.672867	9.5375	3.03175e-06	5.11788e+09	16693500000	5.13975e+10					INF=Inflation Rate
1983	212022	3.64435e+08	13.7675	0.724142	9.97667	3.4154e-06	3.24318e+09	19034200000	3.54516e+10					GDP=Gross domestic Product
1984	223857	1.89165e+08	13.2674	0.764942	10.2417	3.41709e-06	4.66212e+09	21242700000	2.85008e+10					EXCHR=Exchange rate
1985	199012	4.85581e+08	5.54234	0.89375	9.43333	4.49094e-06	5.52501e+09	23153000000	2.8874e+10					INTR=Interest rate
1986	173012	1.93215e+08	11.63	2.02058	9.95917	1.16788e-05	1.29512e+09	23605200000	2.07215e+10					FinDEP=Financial Deepening()			M2/GDP
1987	181230	6.10552e+08	67.3982	4.01794	13.9617	2.21704e-05	3.05964e+09	28895400000	2.40932e+10					GNS=Gross National Savings
1988	187975	3.78667e+08	22.9217	4.53673	16.6167	2.41348e-05	4.2705e+09	38405800000	2.32722e+10					m2=Broad money
1989	206575	1.88425e+09	45.0405	7.39156	20.4417	3.57815e-05	5.38521e+09	43370900000	2.42312e+10
1990	200139	5.87883e+08	9.29085	8.03781	25.3	4.01612e-05	9.38925e+09	57553630000	3.07571e+10
1991	196002	7.12373e+08	17.6048	9.90949	20.0417	5.05581e-05	6.25299e+09	79067300000	2.73929e+10
1992	195153	8.96641e+08	68.0632	17.2984	24.7583	8.86403e-05	5.04066e+09	1.29085e+11	2.93009e+10
1993	192080	1.34537e+09	26.1324	22.0511	31.65	0.000114802	3.00542e+09	1.98479e+11	1.5789e+10
1994	186781	1.95922e+09	31.0091	21.8861	20.4833	0.000117175	3.10631e+09	2.66945e+11	1.80864e+10
1995	191289	1.07927e+09	113.076	21.8861	20.2333	0.000114414	3.89232e+09	3.18763e+11	2.8547e+10
1996	191816	1.59346e+09	32.7271	21.8861	19.8367	0.000114099	9.24009e+09	3.70334e+11	34987951375
1997	192179	1.53945e+09	1.01313	21.8861	17.795	0.000113884	7.85871e+09	4.29731e+11	3.58223e+10
1998	188331	1.05133e+09	-5.66569	21.8861	18.1842	0.000116211	5.70289e+09	5.25638e+11	32004613750
1999	193442	1.00492e+09	17.0501	92.6934	20.29	0.000479178	7.19303e+09	6.99735e+11	3.58708e+10
2000	196966	1.14017e+09	35.2295	102.105	21.2742	0.000518389	1.50165e+10	1.03608e+12	4.6386e+10
2001	199332	1.19062e+09	-0.322617	111.943	23.4383	0.000561593	1.2613e+10	1.30936e+12	4.4138e+10
2002	214461	1.87407e+09	39.8967	120.97	24.7708	0.000564067	1.02893e+10	1555800900000	5.91168e+10
2003	279564	2.00535e+09	11.1409	129.357	20.7142	0.000462709	1.30338e+10	1766010900000	6.76558e+10
2004	281813	1.87406e+09	-0.157748	133.5	19.1808	0.000473719	3.33456e+10	2.13117e+12	8.78454e+10
2005	297095	4.98253e+09	22.0244	132.147	17.9483	0.000444797	5.83425e+10	2612891130000	1.12248e+11
2006	309139	4.85435e+09	17.3378	128.652	16.9	0.000416161	7.29588e+10	3562695900000	1.4543e+11
2007	319934	6.03602e+09	4.77074	125.833	16.9392	0.000393309	7.74048e+10	5.87576e+12	1.66451e+11
2008	333135	8.1955e+09	10.8353	118.567	15.4798	0.000355912	8.07127e+10	9.31511e+12	2.08065e+11
2009	349792	8.55474e+09	-4.32057	148.902	18.3617	0.000425687	7.1627e+10	1.09187e+13	1.69481e+11
2010	357204	6.02623e+09	103.823	150.298	17.585	0.000420762	7.69249e+10	1.16602e+13	3.69062e+11
2011	362648	8.84111e+09	9.5101	153.862	16.0167	0.000424272	7.78016e+10	1.3175e+13	4.11744e+11
2012	372130	7.06993e+09	9.27124	157.499	16.7925	0.000423238	8.60916e+10	1.58891e+13	4.60954e+11
2013	385228	5.56287e+09	5.8733	157.3	16.7225	0.00040833	9.5799e+10	1.74236e+13	5.14966e+11
2014	385142	4.65147e+09	4.66262	158.6	16.5483	0.000411796	9.0737e+10	18196858240532	5.68499e+11
2015	369120	3.13732e+09	2.86367	192.4	16.8488	0.00052124	6.07334e+10	1.87435e+13	4.81066e+11
2016	362580	4.4451e+09	9.54367	253.5	16.867	0.000699155	5.36431e+10	2.09088e+13	4.04653e+11
2017	609964	3.49723e+09	11.1165	305.8	17.5802	0.000501341	5.89592e+10	3.07066e+13	3.75771e+11
